# Supplementary material for: Hyaluronic Acid-Glycine-Cholesterol Conjugate-Based Nanoemulsion as a Potent Vaccine Adjuvant for T Cell-Mediated Immunity
Source: MDPI journal article supplement (doi:10.3390/pharmaceutics13101569), 2021-09-27
Supplement: s1 [file s1]

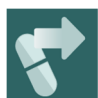

# Supplementary Materials: Hyaluronic Acid-Glycine-Cholesterol Conjugate-Based Nanoemulsion as a Potent Vaccine Adjuvant for T Cell-Mediated Immunity

Chih-An Lin, Hui-Min Ho, Parthiban Venkatesan, Chiung-Yi Huang, Yu-Jhen Cheng, Yu-Hsing Lin, Hua-Yang Lin, Tzu-Yang Chen, Ming-Hsi Huang \* and Ping-Shan Lai \*

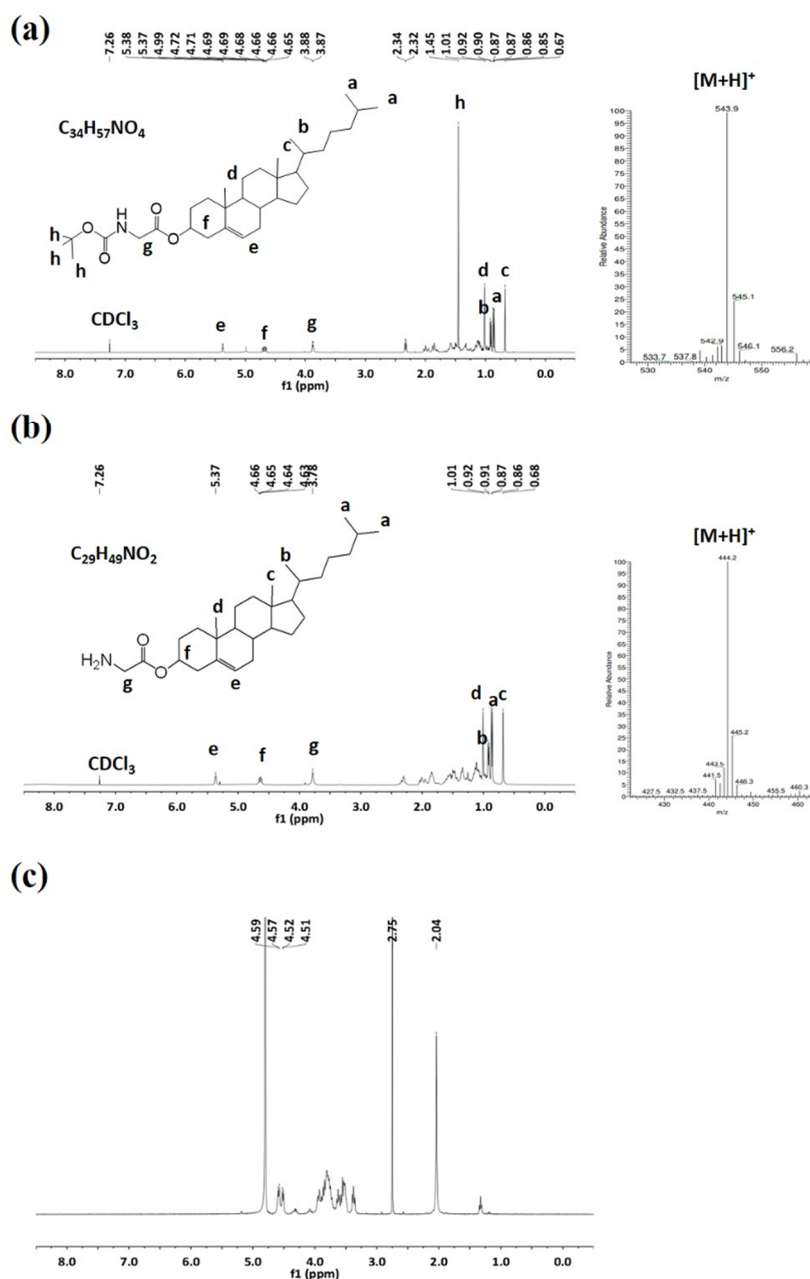

**Figure S1.** Structural identification:  $^1\text{H}$  NMR (CDCl<sub>3</sub>, 400 MHz) and mass spectrums (ESI-MS) of (a) Boc-Gly-cholesterol (b) NH<sub>2</sub>-Gly-cholesterol;  $^1\text{H}$  NMR spectrum (D<sub>2</sub>O/d<sub>6</sub>-DMSO, 400 MHz) of (c) HACH20.

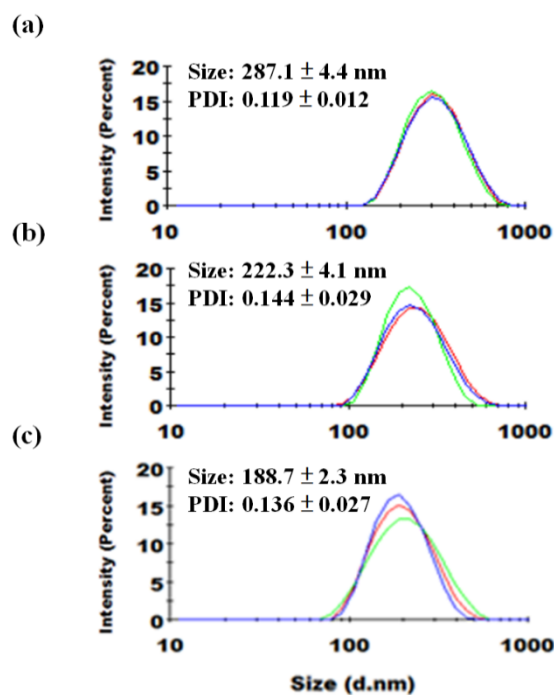

**Figure S2.** Size distribution of SQ@HACH with different passages: (a) 1 passage, (b) 2 passages, and (c) 3 passages through a microfluidizer. The size of SQ@HACH was measured under 100-fold dilution in water by DLS. ( $n = 3$ , mean  $\pm$  SD).

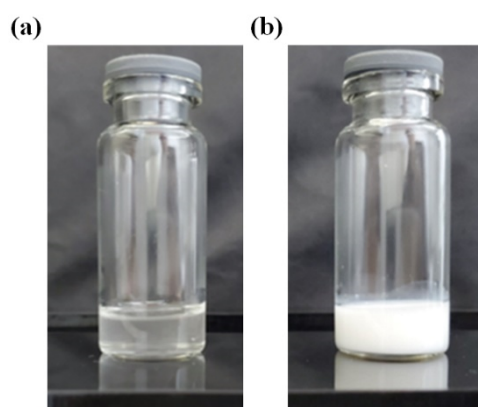

**Figure S3.** Appearance of (a) SQ@HA and (b) SQ@HACH. 5% squalene was added to the solution containing 1% HA and 1% HACH, homogenized and stood for 1 h.
